# Supplementary material for: Development and validation of Chronic Kidney Disease Knowledge, Attitude, and Practices (CKD-KAP) questionnaire
Source: Frontiers journal article supplement (doi:10.3389/fmed.2022.956449), 2022-10-11
Supplement: Data_Sheet_1.PDF [file Data_Sheet_1.PDF]

# Chronic Kidney Disease Knowledge, Attitude and Practices (CKD-KAP) questionnaire

Hospital Name: \_\_\_\_\_

Country State / Province: \_\_\_\_\_

## PART-I DEMOGRAPHICS

Age:  Years

Clinical Experience  Years

Gender: ☐ Male ☐ Female

Practice setting: ☐ Public ☐ Private ☐ Both

Level of Education: ☐ MBBS ☐ PG Trainee ☐ Consultant

Any special training of Nephrology/ CKD: ☐ Yes ☐ No

Have you read KDOQI / KDIGO guidelines for management of CKD? ☐ Yes ☐ No

Source of Information (For CKD) ☐ Books and guidelines ☐ Internet  
☐ Special training ☐ CME activity

## PART-II KNOWLEDGE ABOUT CKD

| Q#  | Particulars                                                                                                                                                                          | Yes | No | Don't know |
|-----|--------------------------------------------------------------------------------------------------------------------------------------------------------------------------------------|-----|----|------------|
| 1.  | CKD is defined as abnormalities of kidney structure or function, present for >3 months, with implications for health                                                                 |     |    |            |
| 2.  | The KDOQI guidelines have classified CKD based on GFR values in 5 classes (G1 to G5)                                                                                                 |     |    |            |
| 3.  | The KDOQI guidelines have classified CKD based on albuminuria value in 3 classes (A1 to A3)                                                                                          |     |    |            |
| 4.  | According to the 2017 ACC/AHA guidelines the target blood pressure in CKD patients should be <130/80 mmHg and those with blood pressure >130 mmHg will be classified as hypertensive |     |    |            |
| 5.  | Is eGFR a better way of assessing decline in kidney function than elevated serum creatinine alone?                                                                                   |     |    |            |
| 6.  | Can age related reduction in eGFR without kidney disease lead to low eGFR with normal serum creatinine, normal urine analysis and normal USG?                                        |     |    |            |
| 7.  | Cockcroft-gault equation is a better tool to estimate GFR than by MDRD equation*                                                                                                     |     |    |            |
| 8.  | The KDIGO 2012 guidelines recommended classifying CKD based on cause, GFR category and albuminuria category                                                                          |     |    |            |
| 9.  | <b>Following are the risk factors which should be considered while predicting the CKD prognosis</b>                                                                                  |     |    |            |
|     | a) Elevated blood pressure                                                                                                                                                           |     |    |            |
|     | b) Hyperglycemia                                                                                                                                                                     |     |    |            |
|     | c) Dyslipidemia                                                                                                                                                                      |     |    |            |
|     | d) History of cardiovascular disease                                                                                                                                                 |     |    |            |
|     | e) Chronic use of NSAIDs, lithium, cyclosporine                                                                                                                                      |     |    |            |
|     | f) Glomerulonephritis                                                                                                                                                                |     |    |            |
| 10. | <b>Following are the complications for which every CKD patient should be continuously monitored</b>                                                                                  |     |    |            |
|     | a) Anemia                                                                                                                                                                            |     |    |            |
|     | b) Metabolic bone disease                                                                                                                                                            |     |    |            |
|     | c) Hyperkalemia                                                                                                                                                                      |     |    |            |
|     | d) Acidosis                                                                                                                                                                          |     |    |            |
|     | e) Edema                                                                                                                                                                             |     |    |            |
|     | f) Acute Kidney Injury                                                                                                                                                               |     |    |            |

|     |                                                                                                                                                                          |  |  |  |
|-----|--------------------------------------------------------------------------------------------------------------------------------------------------------------------------|--|--|--|
| 11. | ACE inhibitors are the first line drugs in the management of CKD in both diabetic and non-diabetic patients                                                              |  |  |  |
| 12. | All patients of CKD should be considered at high risk for developing Acute Kidney Injury (AKI)                                                                           |  |  |  |
| 13. | High protein diet should be administered to all CKD patients at risk of Acute Kidney Injury (AKI)*                                                                       |  |  |  |
| 14. | Guidelines recommend use of isotonic crystalloids fluids in CKD patients with AKI to keep the hydration status                                                           |  |  |  |
| 15. | Dialysis should be initiated in CKD patients with AKI with abrupt changes in electrolytes and fluid                                                                      |  |  |  |
| 16. | Diuretics are recommended to improve kidney function in CKD patients with AKI*                                                                                           |  |  |  |
| 17. | Anticoagulation therapy with enoxaparin or unfractionated heparin is recommended in AKI patients on dialysis (not at risk of bleeding)                                   |  |  |  |
| 18. | Iron therapy is recommended in CKD patients with anemia                                                                                                                  |  |  |  |
| 19. | Erythropoietin therapy is not recommended at Hb > 10 g/dl                                                                                                                |  |  |  |
| 20. | IV Iron dextran should be continued in CKD patients with anemia having systemic infection*                                                                               |  |  |  |
| 21. | Phosphate lowering therapy with phosphate binders is recommended in CKD patients at risk of mineral and bone disorders                                                   |  |  |  |
| 22. | The dose of calcium based phosphate binders should be restricted in G3a-G5 stage CKD patients                                                                            |  |  |  |
| 23. | In CKD G5 stage patients with hyperparathyroidism calcitriol is not recommended*                                                                                         |  |  |  |
| 24. | KDOQI guidelines for dialysis have recommended that initiating dialysis on stage 4 patients with GFR <30ml/min may yield better clinical outcomes and low mortality rate |  |  |  |
| 25. | Anticonvulsant drugs valproic acid is dialyzable and thus require additional dose after dialysis*                                                                        |  |  |  |
| 26. | Loading doses do not needs adjustments in CKD patients                                                                                                                   |  |  |  |
| 27. | Reduction in dose without changing the dosing interval may be associated with LOWER risk of toxicities*                                                                  |  |  |  |
| 28. | Lengthening the dosing interval without changing the dose is associated with higher risk of subtherapeutic drug concentrations                                           |  |  |  |
| 29. | ACE inhibitors should be discontinued if the serum creatinine rise by more than 30%                                                                                      |  |  |  |
| 30. | Metformin can be administered to stage 5 CKD patients with GFR < 15ml/min*                                                                                               |  |  |  |

### PART-III ATTITUDE TOWARDS CKD

Answer the following questions according to 5-point Likert Scale defined below

|                   |          |          |          |                |
|-------------------|----------|----------|----------|----------------|
| Strongly disagree | Disagree | Neutral  | Agree    | Strongly agree |
| <b>1</b>          | <b>2</b> | <b>3</b> | <b>4</b> | <b>5</b>       |

| Q #                                  | Statement                                                                                              | 1 | 2 | 3 | 4 | 5 |
|--------------------------------------|--------------------------------------------------------------------------------------------------------|---|---|---|---|---|
| <b>General attitudes towards CKD</b> |                                                                                                        |   |   |   |   |   |
| 1.                                   | Dose of all renally excreted drugs should not be adjusted to prevent toxicities in CKD patients*       |   |   |   |   |   |
| 2.                                   | Every CKD patient on dialysis should be regularly screened for hepatitis                               |   |   |   |   |   |
| 3.                                   | Prescribing in line with the latest guidelines can improve clinical outcomes                           |   |   |   |   |   |
| 4.                                   | Early diagnosis of CKD can prevent all-cause mortality                                                 |   |   |   |   |   |
| 5.                                   | Physicians should study the latest clinical guidelines to provide better clinical services.            |   |   |   |   |   |
| 6.                                   | Clinical pharmacist can help improve clinical outcomes and reduce toxicities in CKD patients           |   |   |   |   |   |
| <b>Kidney damage and outcomes</b>    |                                                                                                        |   |   |   |   |   |
| 7.                                   | Providing dietary counseling to CKD patients is not required*                                          |   |   |   |   |   |
| 8.                                   | Every CKD patient should be considered at high risk of acute kidney injury                             |   |   |   |   |   |
| 9.                                   | Drugs cannot cause kidney damage*                                                                      |   |   |   |   |   |
| 10.                                  | More research is required to determine factors affecting clinical outcomes in CKD patients in Pakistan |   |   |   |   |   |
| 11.                                  | CKD patients should not administer herbal and alternate medicine                                       |   |   |   |   |   |
| <b>Dialysis</b>                      |                                                                                                        |   |   |   |   |   |
| 12.                                  | Dialysis facilities for hepatitis C should be kept separate                                            |   |   |   |   |   |
| 13.                                  | Drug therapy of CKD patients should be reviewed after initiation of dialysis                           |   |   |   |   |   |

## PART-IV PRACTICES ABOUT CKD

Answer the following questions according to 4-point Likert Scale defined below

|          |          |          |          |
|----------|----------|----------|----------|
| Never    | Seldom   | Often    | Always   |
| <b>1</b> | <b>2</b> | <b>3</b> | <b>4</b> |

| Q #                              | Statement                                                                                                         | 1 | 2 | 3 | 4 |
|----------------------------------|-------------------------------------------------------------------------------------------------------------------|---|---|---|---|
| <b>General practices for CKD</b> |                                                                                                                   |   |   |   |   |
| 1.                               | Do you refer your CKD patients to nephrologist at stage G5?*                                                      |   |   |   |   |
| 2.                               | Do you use serum creatinine to adjust medication doses in CKD patients?*                                          |   |   |   |   |
| 3.                               | Do you review the drug therapy of your CKD patients for potential Drug Related Problems (DRP's) and interactions? |   |   |   |   |
| 4.                               | Do you provide dietary counseling to your CKD patients?                                                           |   |   |   |   |
| <b>Monitoring of CKD</b>         |                                                                                                                   |   |   |   |   |
| 5.                               | Do you routinely measure urine protein (albumin) in your CKD patients?                                            |   |   |   |   |
| 6.                               | Do you monitor Iron, RBC and hemoglobin of your CKD patients for anemia after every 3 months?                     |   |   |   |   |
| <b>Measurement of GFR</b>        |                                                                                                                   |   |   |   |   |
| 7.                               | Do you use MDRD equation for calculating GFR from serum creatinine?                                               |   |   |   |   |
| 8.                               | Do you diagnose and stage your CKD patients based on serum creatinine instead of GFR values?*                     |   |   |   |   |
| <b>Complications of CKD</b>      |                                                                                                                   |   |   |   |   |
| 9.                               | Do you recommend your CKD patients to undergo Bone Mineral Density (BMD) scan for determining osteoporosis?       |   |   |   |   |
| 10.                              | Do you routinely monitor calcium, phosphorous and PTH levels in CKD patients?                                     |   |   |   |   |

THANK YOU
